# Supplementary material for: Routine high-precision Nd isotope analyses: an optimized chromatographic purification scheme
Source: Royal Society of Chemistry journal article supplement (doi:10.1039/d1ja00169h), 2021-01-01
Supplement: d1ja00169h1.xlsx [file d1ja00169h1.xlsx]

## Sheet: Sheet1
Purpose of part		Part description	Qty	Sold by	Manufacturer	Part #	2021 list price	Link (url)
REE preconcentration chemistry
1	Acid reservoir	Funnel (145 mL capacity), pack of 50	1 per column	Pack of 50	Environmental Express	R1030-145	39.1	https://www.envexp.com/products/5-Radiochemistry/RAD-Radiochemistry_Testing/COLUMNS-ION_Exchange_Columns/R1030_145-145mL_Funnel_for_use_w%7C_all_Rad_Columns%2C_50pk
2	Column	Column w/ frit, 5.5 mL bed area	1 per column	Pack of 50	Environmental Express	R1010	78.6	https://www.envexp.com/products/5-Radiochemistry/RAD-Radiochemistry_Testing/COLUMNS-ION_Exchange_Columns/R1010-Small_Column_With_Frit,_50pk
3	Resin	AG50W-X8 analytical grade, 100–200 mesh, H+ form	5.5 ml	500 g	BioRad	#1421441	734	https://www.bio-rad.com/en-us/sku/1421441-ag-50w-x8-cation-exchange-resin-analytical-grade-100-ndash-200-mesh-hydrogen-form-500-g?ID=1421441
4	REE collection vial	60 mL PFA standard jar	1 per column	1	Savillex	100-0060-01	18.9	https://www.savillex.com/en/product/jars/60-ml-standard-jar--100-0060-01?pageid=19
5	REE collection vial cap	53 mm PFA closure for above jar	1 per column	1	Savillex	600-053-01	18.9	https://www.savillex.com/en/product/sample-collection-closures/53-mm-closure--600-053-01
α-HIBA chemistry*
Column pressurization
6	Low pressure precision regulator	0-4 psi, 1/4" inlet/outlet NPTF port thread, nitrile elastomer, knob actuator, normal bleed relief, straight vent, bonnet (2 x 1/4-20 UNC)	1 per entire set-up	1	Fairchild	11132NNKRSB	292.91	http://fairchildproducts.com/product/low-pressure-precision-pressure-regulator-m11/
7	Pressure regulator to tubing adapter	Barbed PVDF tube fitting, 3/8" Tube ID x 1/4 NPT Male	1	1	McMaster-Carr	53055K427	5.3	https://www.mcmaster.com/53055K427/
8	Tubing for air supply	Soft tygon PVC tubing 3/8" ID, 1/2" OD	As needed	ft	McMaster-Carr	6516T26	2.15	https://www.mcmaster.com/6516T26/
9	Tubing to tee (for low pressure gauge) adapter	Same as 7	2
10	Tee for pressure gauge	PVC tee-connector (1/4 NPT female)	1 per entire set-up	1	McMaster-Carr	4596K321	4.64	https://www.mcmaster.com/4596K321/
11	Pressure reading	High-accuracy low pressure gauge with steel case, 1/4 NPT Male	1	1	McMaster-Carr	4026K37	67.36	https://www.mcmaster.com/4026K37/
12	Primary air supply splitter (for two or more columns)	Plastic barbed wye-reducer, 3/8" to 1/4" ID tubing	As needed	Pack of 5	McMaster-Carr	5463K722	9.43	https://www.mcmaster.com/5463K722
13	Tubing for air supply	Soft tygon PVC tubing, 1/4" ID, 3/8" OD	As needed	ft	McMaster-Carr	55485K74	5.71	https://www.mcmaster.com/55485K74/
14	Secondary air supply splitter	Push-to-connect wye connector, from and to 3/8" OD tubing	As needed		McMaster-Carr	5779K46	8.73	https://www.mcmaster.com/5779K46/
Column and drop counter
15	Connect pressurization tubing to column	Spherical joint adapter, 18/9	1 per column	1	Prism Research Glass	PRG-1175-22	25.04	https://www.prismresearchglass.com/product/spherical-joint-adapter-inlet-outlet-with-hose-barb/
16	To secure glass joint to glass column	Plastic clips (clamps) for jointed glassware	1 per column	Pack of 10	Fisher Scientific	14-955-254	30	https://www.fishersci.com/shop/products/fisherbrand-plastic-joint-clips-9/14955254?searchHijack=true&searchTerm=14955254&searchType=RAPID&matchedCatNo=14955254
17	Glass column	Borosilicate, custom-made (from parts below)	1 per column	1
	Component 1: Head	Spherical ball-joint, 18/9	1 per column	1	Prism Research Glass	PRG-1175-03	25.04	https://www.prismresearchglass.com/product/spherical-joint-adapter-inlet-outlet-with-hose-barb/
	Component 1: Alternative	Same as above but with o-ring for improved seal	1 per column	1	Prism Research Glass	PRG-1175-13	26.65	https://www.prismresearchglass.com/product/spherical-joint-adapter-inlet-outlet-with-hose-barb/
	Component 2: Reservoir	22 mm OD tubing, 12-15 mL capacity	1 per column	1	Prism Research Glass	custom order
	Component 3: Capillary	32-33 cm long, 5 mm OD, 2 mm ID	1 per column	1	Prism Research Glass	custom order
18	Resin	AG50W-X4 analytical grade, 200–400 mesh, H+ form	~0.95 mL	500 g	BioRad	#1421351	665	https://www.bio-rad.com/en-us/sku/1421351-ag-50w-x4-cation-exchange-resin-analytical-grade-200-ndash-400-mesh-hydrogen-form-500-g?ID=1421351
19	Column frit	35 μm filter paper	1 layer per column run	Pack of 50	Ahlstrom	6170-1100	14.1	https://www.amazon.com/Ahlstrom-6170-1100-Qualitative-Filter-Diameter/dp/B006H8XEYS/ref=sr_1_3?dchild=1&keywords=filter+paper+35&qid=1624640521&sr=8-3
20	Cut frits to size (5mm)	Cork borer set	1 per entire set-up	1 set	Fisher Scientific	NC9546789	136.53	https://www.fishersci.com/shop/products/cork-borer-set-12/nc9546789
21	Drop counter	Drop counter logger sensor	1 per column	1	Neulog	NUL-223	(~$100)***	https://neulog.com/drop-counter/
22	Drop counter display	Drop counter display module	1 per entire set-up	1	Neulog	VIEW-101	***	https://neulog.com/graphic-display/
23	Power supply to drop counter	Drop counter battery module	1 per entire set-up	1	Neulog	BAT-202 or 200	***	https://neulog.com/battery/
24	Nd collection vial	7 mL PFA standard vial, rounded interior	1 per column	1	Savillex	200-007-20	9.65	https://www.savillex.com/en/product/vials/7-ml-standard-vial-rounded-interior--200-007-20?pageid=19
25	Nd collection vial cap	24 mm PFA closure for above jar	1 per column	1	Savillex	600-024-01	6.9	https://www.savillex.com/en/product/clean-sample-prep-closures/24-mm-closure--600-024-01
Column holder
26	Column holder cap and base	Machined from polypropylene rod, 2" OD (see CAD drawing)	1 per column	1 ft	McMaster-Carr	8624K18	17.67	https://www.mcmaster.com/8624K18
27	Column holder body	Machined from UHMW cylinder (1/2" wall, 2" OD, 1" ID)	1 per column	2 ft	McMaster-Carr	8705K73	49.2	https://www.mcmaster.com/8705K73/
28	Connect base and cap to column holder	Hex-head screws, 1/4-20, 1" length	6 per column holder	Pack of 100	McMaster-Carr	91244A542	16.98	https://www.mcmaster.com/91244A542/
29	Connect column holder to mobile block	Flat-head screws, 1/4-20, 1" length	2 per column holder	Pack of 100	McMaster-Carr	94605A542	9.76	https://www.mcmaster.com/94605A542/
30	Mobile block	UHMW polyethylene bar, 2.5'' wide, 1.25'' thick	1 per column holder	1 ft	McMaster-Carr	8702K426	12.22	https://www.mcmaster.com/8702K426/
31	Secure mobile block to stand**	Hex-head screws, 3/8-16, 1" length	2 per column holder	Pack of 25	McMaster-Carr	91244A624	7.94	https://www.mcmaster.com/91244A624/
Suggested reagents and special labware
	Eluent for REE pre-concentration chemistry	HCl Optima	As needed	1 L	Fisher Scientific	A466-1	1341	https://www.fishersci.com/shop/products/hydrochloric-acid-optima-fisher-chemical-6/A4661#?keyword=A466%201
	Used for Ce oxidation	Hydrogen peroxide (Optima) H2O2	200 μL per sample	500 mL	Optima/Fisher Scientific	P170500	1001	https://www.fishersci.com/shop/products/hydrogen-peroxide-optima-fisher-chemical/P170500
	Sample loading for α-HIBA chemistry	Pipette controller	1	1	VWR	89410-174	139.71	https://us.vwr.com/store/catalog/product.jsp?catalog_number=89410-176
	Sample loading for α-HIBA chemistry	Borosilicate pipette tips	As needed	Pack of 1000	VWR	14673-043	201.66	https://us.vwr.com/store/product/4758176/vwr-disposable-pasteur-pipets-glass
	To make α-HIBA acid	α-HIBA acid, powder form	As needed	100 g	MilliporeSigma	323594	129	https://www.sigmaaldrich.com/US/en/product/aldrich/323594?context=product
	To adjust pH of α-HIBA solution	NH4OH solution, 20-22%	As needed	500 mL	Fisher Scientific	A669S-500	137	https://www.fishersci.com/shop/products/ammonium-hydroxide-certified-acs-plus-fisher-chemical-7/A669S500
* The α-HIBA setup starts at the pressure regulator, assuming each user's pressure system is unique and therefore connection to the regulator is user depedent.
** The stand is assumed to be a typical chemistry stand, with OD of 1 cm. The mobile block moving up and down the stand can be adjusted for different OD if needed.
*** Dependent on distributor.
